# Supplementary material
Source: Springer Nature journal article supplement (https://www.springerprofessional.de/resource/supplementary/13638_2014_999_MOESM8_ESM.pdf/11898978)

Throughput of 2x2 Spatial Multiplexing with Turbocoded 64QAM-1/2

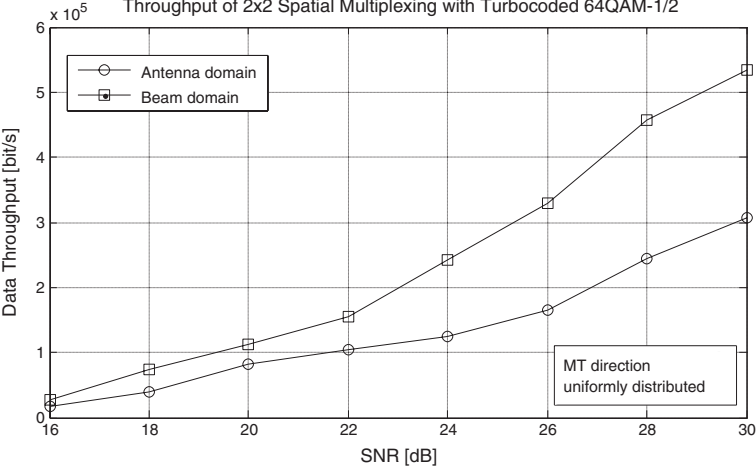

Supplement: MOESM8 [file 11898978]
